# Supplementary material for: Glass-limited Yb/Er:NaLuF4 nanocrystals: reversible hexagonal-to-cubic phase transition and anti-counterfeiting
Source: Royal Society of Chemistry journal article supplement (doi:10.1039/d0tc03775c), 2020-01-01
Supplement: d0tc03775c1.pdf [file d0tc03775c1.pdf]

## Electronic Supporting Information

### Glass-Limited Yb/Er: NaLuF<sub>4</sub> Nanocrystals: Reversible Hexagonal-to-Cubic Phase Transition and Anti-Counterfeiting

Shaoxiong Wang <sup>a, ‡</sup>, Jidong Lin <sup>a, ‡</sup>, Xiaoyan Li <sup>b, \*</sup>, Jiangkun Chen <sup>a, c</sup>, Changbin Yang

<sup>a, c</sup>, Ping Huang <sup>e, \*</sup>, Yao Cheng <sup>e</sup>, Daqin Chen <sup>a, c, d, f, \*</sup>

[a] College of Physics and Energy, Fujian Normal University, Fujian Provincial Key Laboratory of Quantum Manipulation and New Energy Materials, Fuzhou, 350117, China E-Mail: [dqchen@fjnu.edu.cn](mailto:dqchen@fjnu.edu.cn)

[b] College of Electronics and Information Science, Fujian Jiangxia University, Fuzhou, 350108, China E-Mail: [xyli@fjxu.edu.cn](mailto:xyli@fjxu.edu.cn)

[c] Fujian Science & Technology Innovation Laboratory for Optoelectronic Information of China, Fuzhou, 350108, China

[d] Fujian Provincial Collaborative Innovation Center for Advanced High-Field Superconducting Materials and Engineering, Fuzhou, 350117, China

[e] State Key Laboratory of Structural Chemistry, Fujian Institute of Research on the Structure of Matter, Chinese Academy of Sciences, Fuzhou, 350002, China  
E-Mail: [phuang@fjirsm.ac.cn](mailto:phuang@fjirsm.ac.cn)

[f] Fujian Provincial Engineering Technology Research Center of Solar Energy Conversion and Energy Storage, Fuzhou, 350117, China

**Table S1** crystallographic data of cubic  $\alpha$ -NaLuF<sub>4</sub> (left) and hexagonal  $\beta$ -NaLuF<sub>4</sub> (right).

| Atomic parameters |        |        |        |
|-------------------|--------|--------|--------|
| Atom              | x/a    | y/b    | z/c    |
| Na                | 0.0000 | 0.0000 | 0.0000 |
| Lu                | 0.0000 | 0.0000 | 0.0000 |
| F                 | 0.2500 | 0.2500 | 0.2500 |
| Space-group       | a      | b      | c      |
| Fm-3m             | 5.47 Å | 5.47 Å | 5.47 Å |

| Atomic parameters |        |        |        |
|-------------------|--------|--------|--------|
| Atom              | x/a    | y/b    | z/c    |
| Na(1)             | 0.6667 | 0.3333 | 0.5000 |
| Na(2)             | 0.3333 | 0.6667 | 0.6890 |
| Lu(1)             | 0.0000 | 0.0000 | 0.0000 |
| Lu(2)             | 0.6667 | 0.3333 | 0.5000 |
| F(1)              | 0.6460 | 0.1256 | 0.0000 |
| F(2)              | 0.6970 | 0.7220 | 0.5000 |
| Space-group       | a      | b      | c      |
| P -6              | 5.91 Å | 5.91 Å | 3.50 Å |

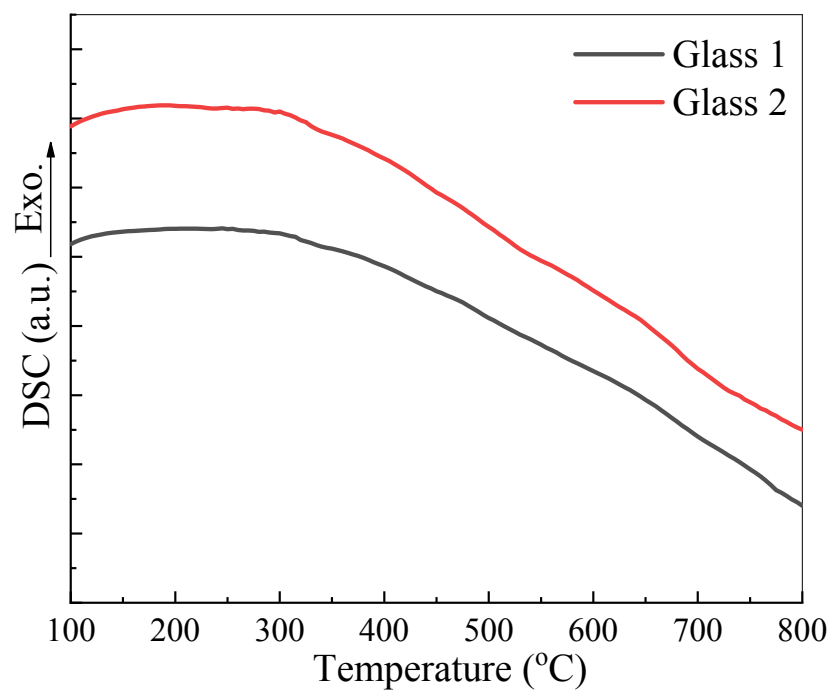

**Figure S1** DSC curve of the glass 1 and glass 2 samples recorded at a heating rate of 10 K/min in temperature range of 100~800 °C.

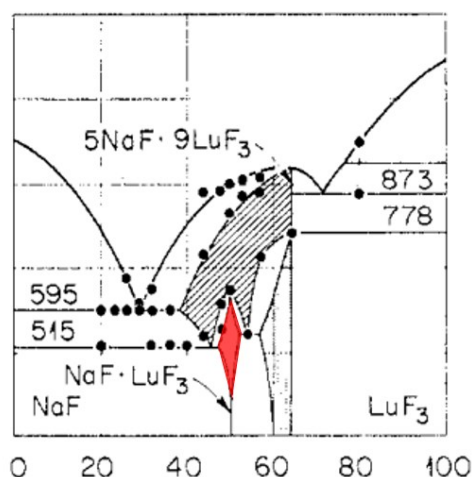

**Figure S2** Binary equilibrium phase diagram of the NaF-LuF<sub>3</sub> system <sup>S1,S2</sup>, in which the red region represents hexagonal NaF-LuF<sub>3</sub> solid-solution phase.

[S1] Thoma, R. E.; Hebert, G. M.; Insley, H.; Weaver, C. F. Phase Equilibria in the System Sodium Fluoride-Yttrium Fluoride. *Inorg. Chem.* **1963**, 2, 1005-1012.

[S2] Thoma, R. E.; Insley, H.; Hebert, G. M. The Sodium Fluoride-Lanthanide Trifluoride Systems. *Inorg. Chem.* **1966**, 5, 1222-1229.

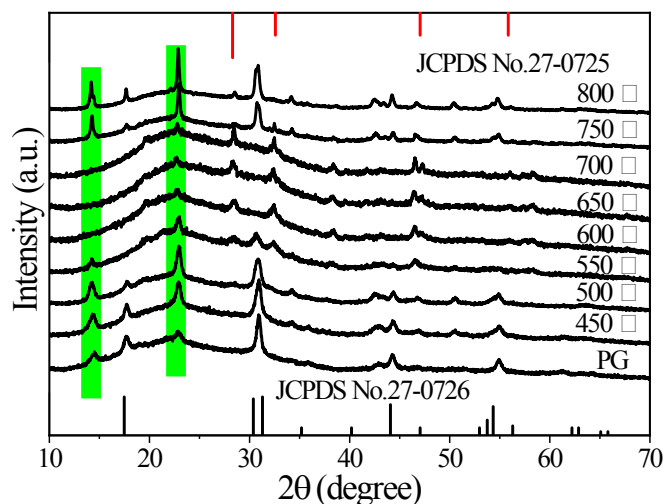

**Figure S3** XRD patterns of Eu<sup>3+</sup>-doped precursor glass and NaLuF<sub>4</sub>@glass samples obtained by heating PG at different temperatures (450~800 °C). Bars represent standard diffraction data of cubic α-NaLuF<sub>4</sub> (JCPDS No. 27-0725) and hexagonal β-NaLuF<sub>4</sub> (JCPDS No. 27-0726).

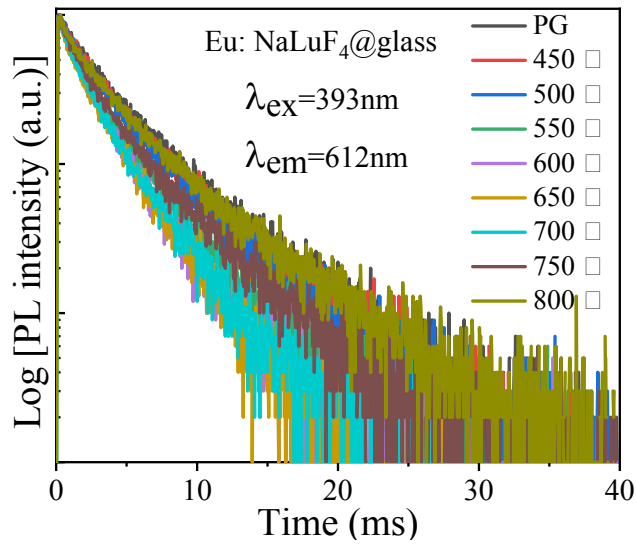

**Figure S4** PL decay curves ( $\lambda_{em}=612$  nm) of  $\text{Eu}^{3+}$ -doped precursor glass and  $\text{NaLuF}_4$ @glass samples obtained by heating PG at different temperatures (450~800 °C).

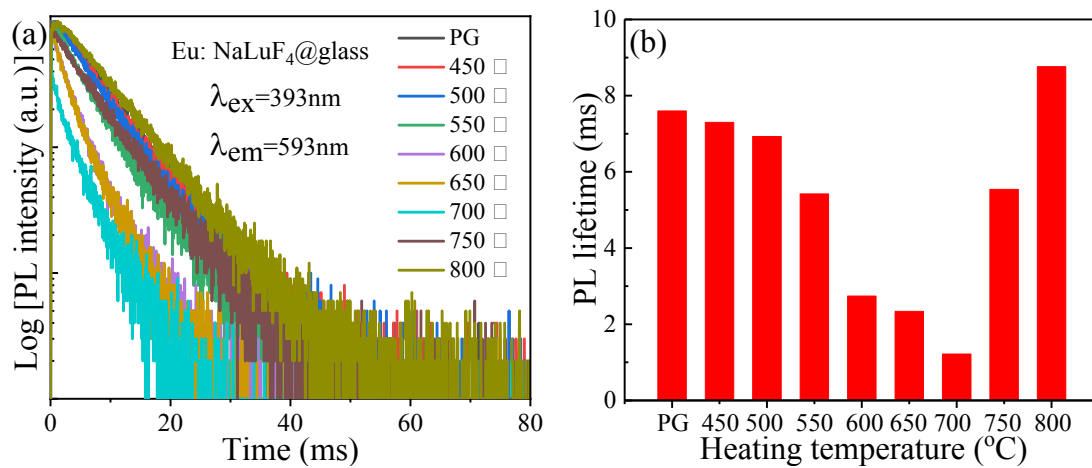

**Figure S5** (a) PL decay curves ( $\lambda_{em}=593$  nm) of  $\text{Eu}^{3+}$ -doped precursor glass and  $\text{NaLuF}_4$ @glass samples obtained by heating PG at different temperatures (450~800 °C). (b) The evaluated decay lifetime versus heating temperature.

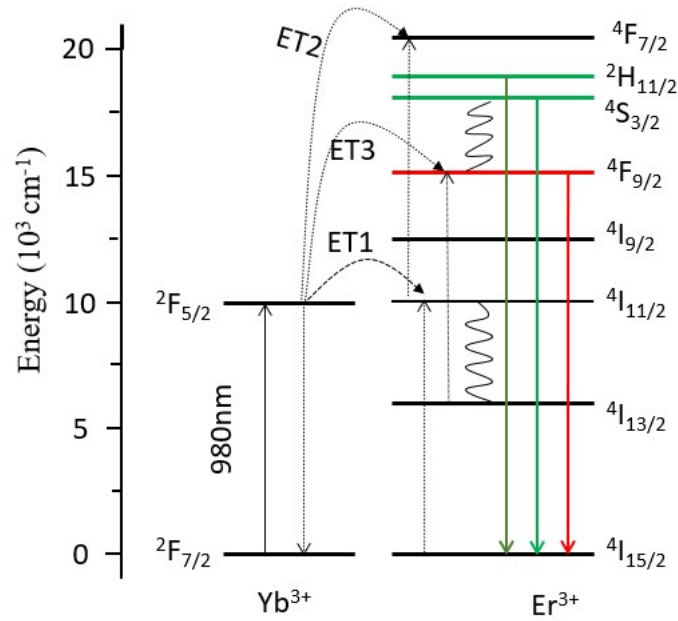

**Figure S6** Energy level diagram of Yb<sup>3+</sup> and Er<sup>3+</sup> activators, showing possible energy transfer upconversion mechanism in the present Yb/Er: NaLuF<sub>4</sub>@glass.

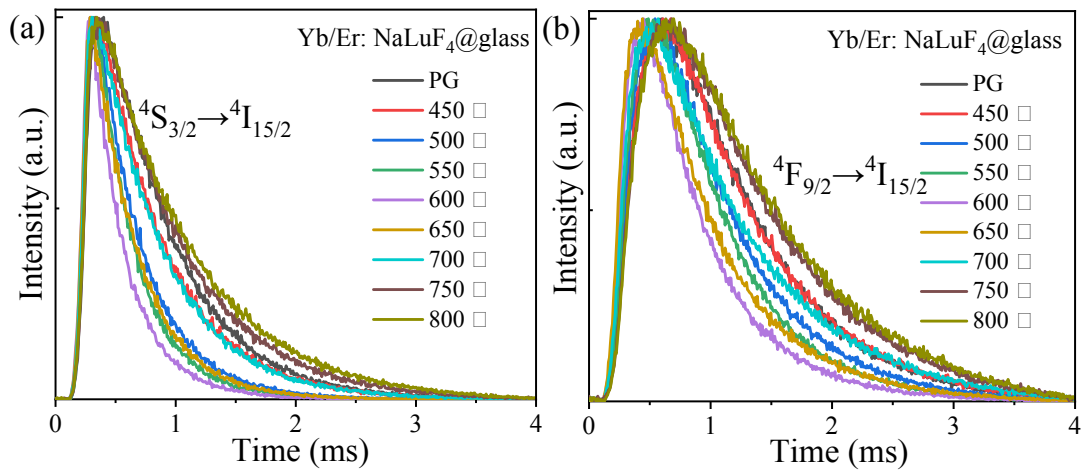

**Figure S7** UC decay curves of Yb/Er-doped precursor glass and NaLuF<sub>4</sub>@glass samples obtained by heating PG at different temperatures (450~800 °C): (a) monitoring <sup>4</sup>S<sub>3/2</sub> 543 nm green emitting, (b) monitoring <sup>4</sup>F<sub>9/2</sub> 669 nm red emitting.

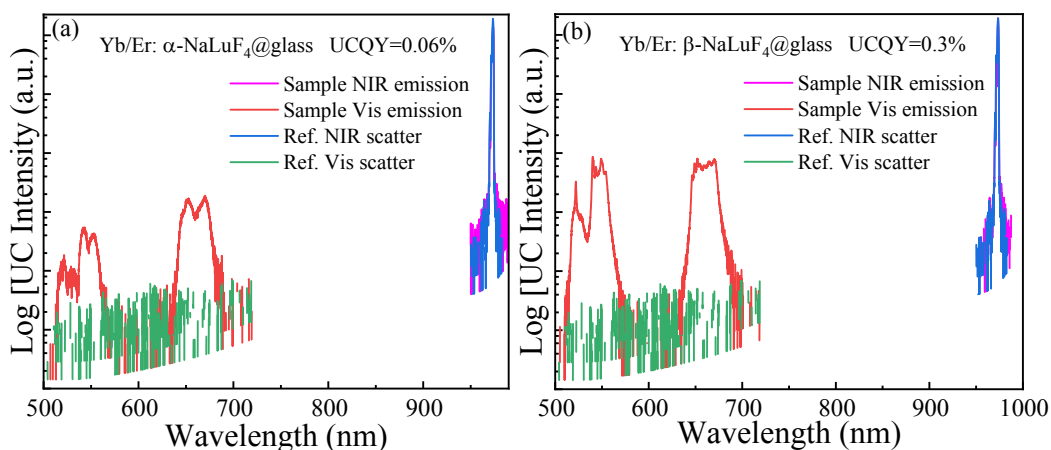

**Figure S8** Quantitative UC emission spectra of Yb/Er-doped  $\text{NaLuF}_4$ @glass samples and the corresponding references for UCQY determination: (a)  $\alpha$ - $\text{NaLuF}_4$ , (b)  $\beta$ - $\text{NaLuF}_4$ . All the spectra were recorded by a spectrofluorometer equipped with an integrating sphere.

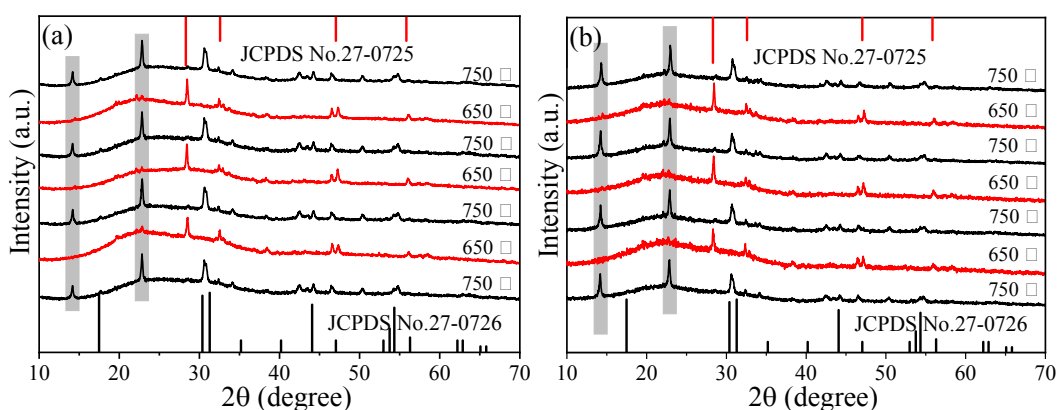

**Figure S9** XRD patterns of Yb/Er ( $x/1$  mol%) doped  $\text{NaLuF}_4$ @glass samples obtained by 750 °C / 650 °C cycling heat-treatment: (a)  $x=50$ , (b)  $x=80$ . Bars represent standard diffraction data of cubic  $\alpha$ - $\text{NaLuF}_4$  (JCPDS No. 27-0725) and hexagonal  $\beta$ - $\text{NaLuF}_4$  (JCPDS No. 27-0726).

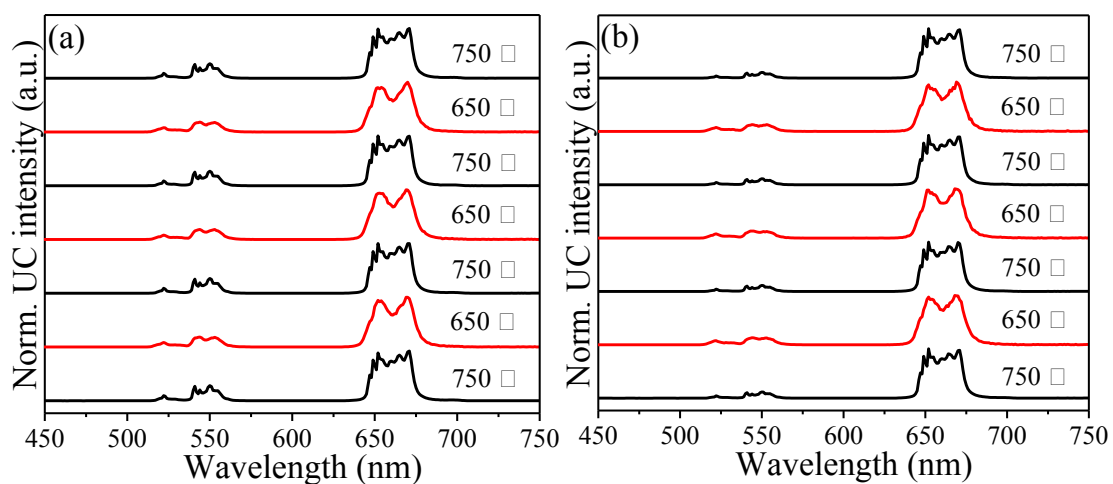

**Figure S10** UC emission spectra Yb/Er (x/1 mol%) doped NaLuF<sub>4</sub>@glass samples obtained by 750 °C / 650 °C cycling heat-treatment: (a) x=50, (b) x=80. The laser excitation wavelength is 980 nm.

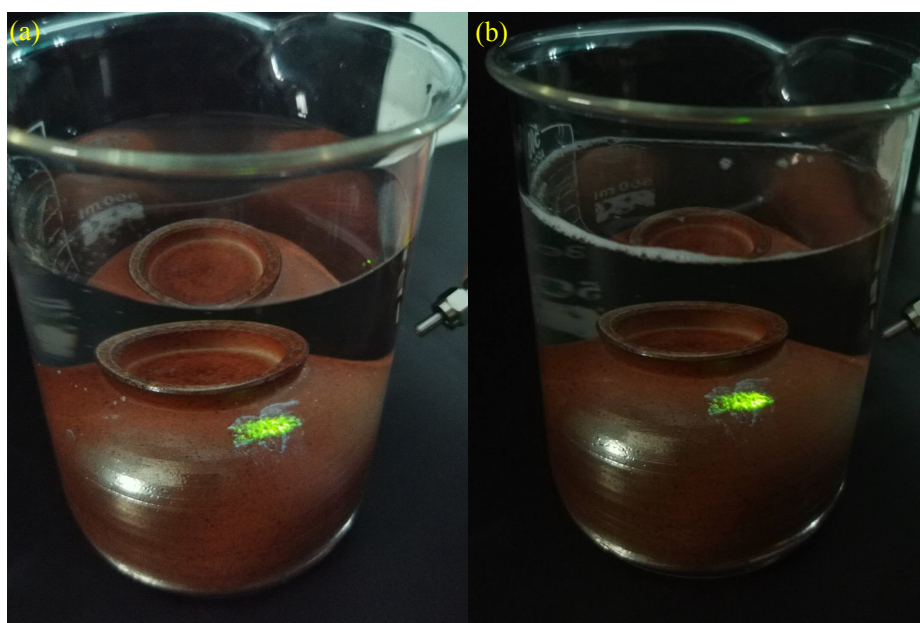

**Figure S11** UC luminescence photographs of the flower pattern decorated porcelain in solution for 180 days: (a) water solution, (b) oil solution. The incident laser wavelength is 980 nm.
